# Supplementary material for: Sodium channels implement a molecular leaky integrator that detects action potentials and regulates neuronal firing
Source: eLife. 2020 Feb 26;9:e54940. doi: 10.7554/eLife.54940 (PMC7043890; doi:10.7554/eLife.54940)
Supplement: Figure 2—source data 1. [file elife-54940-fig2-data1.xlsx]

## Sheet: Fig2B
Na+ current recovery from inactivation, voltage-clamp, room temperature
Raphe obscurus neurons								Dorsal raphe neurons
	@-100 mV			@-80 mV					@-100 mV			@-80 mV
Time [s]	Fraction recovered			Fraction recovered				Time [s]	Fraction recovered			Fraction recovered
	Mean	Std	N	Mean	Std	N			Mean	Std	N	Mean	Std	N
0	0.0458684	0.0107264	6	0.0437938	0.0186476	18		0.002	0.23974	0.0903722	5	0.1598	0.0670895	6
0.00075	0.277732	0.0335404	6	0.114481	0.03016	18		0.004	0.42358	0.14069	5	0.32225	0.0863539	6
0.00135	0.520937	0.0338418	6	0.253082	0.0555922	18		0.008	0.58748	0.126452	5	0.520567	0.0961041	6
0.00243	0.698996	0.0465291	6	0.44626	0.0663295	18		0.016	0.7	0.11299	5	0.666217	0.058822	6
0.004374	0.753755	0.0298895	6	0.625305	0.063049	18		0.032	0.77468	0.0858032	5	0.78335	0.022461	6
0.0078732	0.786365	0.0276872	6	0.72649	0.0630967	18		0.064	0.8219	0.0645681	5	0.837717	0.0279289	6
0.0141718	0.805383	0.0315015	6	0.767541	0.0680404	18		0.128	0.87476	0.0451564	5	0.877	0.0339125	6
0.0255092	0.830341	0.029623	5	0.785855	0.0644552	18		0.256	0.90315	0.023304	4	0.90615	0.0355269	6
0.0459165	0.847399	0.0256972	6	0.800778	0.0597375	18		0.512	0.939675	0.011037	4	0.92355	0.0301856	6
0.0826497	0.880563	0.0311393	4	0.817702	0.0553427	18		1.024	0.97	0.0173179	3	0.955583	0.0202465	6
0.148769	0.903425	0.0401629	4	0.845726	0.0530059	18		2.048	0.9716	0.0139581	3	0.976817	0.0334316	6
0.267785	0.933285	0.0451039	3	0.87312	0.0432957	18		4.096	1.0017	0.0208612	3	1.00465	0.00873022	4
0.482013	0.969055	0.0244221	4	0.905467	0.0345152	18
0.867623	0.994712	0.0181124	3	0.937962	0.032282	18
1.56172	1.00863	0.000897306	2	0.950488	0.015229	4
