# Supplementary material for: Sodium channels implement a molecular leaky integrator that detects action potentials and regulates neuronal firing
Source: eLife. 2020 Feb 26;9:e54940. doi: 10.7554/eLife.54940 (PMC7043890; doi:10.7554/eLife.54940)
Supplement: Figure 3—source data 1. [file elife-54940-fig3-data1.xlsx]

## Sheet: Fig3A
Nav model with LTI
Rate constant k(i, j) = k0*exp(k1*V)
Rate constant [1/ms]	k0 [1/ms]	k1 [1/mV]
k(1, 2)	21.0175	0.01474
k(2, 1)	0.345432	-0.08526
k(2, 3)	15.7631	0.01474
k(3, 2)	0.690865	-0.08526
k(3, 4)	10.5088	0.01474
k(4, 3)	1.0363	-0.08526
k(4, 5)	5.25438	0.01474
k(5, 4)	1.38173	-0.08526
k(5, 6)	85.0701	0.005784
k(6, 5)	5.89523	-0.01043
k(7, 8)	14.943	0.01474
k(8, 7)	0.0422296	-0.08526
k(8, 9)	11.2073	0.01474
k(9, 8)	0.0844592	-0.08526
k(9, 10)	7.4715	0.01474
k(10, 9)	0.126689	-0.08526
k(10, 11)	3.73575	0.01474
k(11, 10)	0.168918	-0.08526
k(11, 12)	25.4493	0.005784
k(12, 11)	26.0631	-0.01043
k(1, 7)	0.0595355	0.02803
k(7, 1)	0.0106776	-0.0427
k(2, 8)	0.0423285	0.02803
k(8, 2)	0.00130535	-0.0427
k(3, 9)	0.0300947	0.02803
k(9, 3)	0.000159581	-0.0427
k(4, 10)	0.0213967	0.02803
k(10, 4)	1.9509e-05	-0.0427
k(5, 11)	0.0152126	0.02803
k(11, 5)	2.385e-06	-0.0427
k(6, 12)	1.80478	0.02803
k(12, 6)	0.00418153	-0.0427
k(6, 13)	0.4008	-0.01101
k(13, 6)	0.0002073	-0.03096
