# Supplementary material for: Sodium channels implement a molecular leaky integrator that detects action potentials and regulates neuronal firing
Source: eLife. 2020 Feb 26;9:e54940. doi: 10.7554/eLife.54940 (PMC7043890; doi:10.7554/eLife.54940)
Supplement: Figure 5—source data 1. [file elife-54940-fig5-data1.xlsx]

## Sheet: Fig5B
Spiking frequency vs. GNa, Iinj = 0, dynamic clamp, room temperature
Raphe obscurus neurons
	LTI model			non-LTI model
GNa [nS/pF]	Spiking frequency [Hz]			Spiking frequency [Hz]
	Mean	SE	N	Mean	SE	N
5	3.33838	0.723835	7	5.01465	1.3017	7
10	4.72661	0.721459	7	5.90709	0.715655	7
20	6.44538	0.862011	7	7.25755	1.02024	7
Fit with equation:
f=A*g + B
	Mean	SE		Mean	SE
A	0.2021	0.02617		0.1475	0.01075
B	2.479	0.3462		4.339	0.1422
Different line for each data set (P=0.0372)
