# Supplementary material for: Sodium channels implement a molecular leaky integrator that detects action potentials and regulates neuronal firing
Source: eLife. 2020 Feb 26;9:e54940. doi: 10.7554/eLife.54940 (PMC7043890; doi:10.7554/eLife.54940)
Supplement: Figure 6—source data 1. [file elife-54940-fig6-data1.xlsx]

## Sheet: Fig6D
Spiking frequency vs. IInj, dynamic clamp, room temperature
Raphe obscurus neurons
LTI model								non-LTI model
	GNa = 10 nS/pF			GNa = 15 nS/pF					GNa = 10 nS/pF			GNa = 15 nS/pF
Iinj [pA]	Spiking frequency [Hz]			Spiking frequency [Hz]				Iinj [pA]	Spiking frequency [Hz]			Spiking frequency [Hz]
	Mean	SE	N	Mean	SE	N			Mean	SE	N	Mean	SE	N
0	4.53847	0.403678	13	5.72076	0.688958	13		0	5.25039	0.446919	13	6.21656	0.665692	13
5	5.511	0.566226	13	6.92848	0.490637	13		5	6.74414	0.586961	13	8.17433	0.83489	13
10	6.54286	0.546996	13	7.45201	0.746266	11		10	7.85651	0.733639	13	9.35662	0.832984	13
20	7.53445	0.578522	13	8.13619	0.711614	13		20	10.3058	0.878911	13	11.4754	1.0346	13
40	8.74811	0.689275	10	8.97948	0.755051	8		40	13.2948	1.02195	12	13.7722	1.76077	6
Fit with equation:
f = A1*exp(-i/B) + A0
	Mean	SE		Mean	SE				Mean	SE		Mean	SE
A1	-4.882	0.2826		-3.267	0.3136				-13.33	1.321		-9.144	0.5257
B	20.18	2.647		14.08	3.274				42.87	6.86		23.64	2.642
A0	9.405	0.3021		9.064	0.3142				18.56	1.379		15.42	0.5581
Different curve for each data set (P<0.0001)
